# Supplementary material for: Reduced osteoprotegerin expression by osteocytes may contribute to rebound resorption after denosumab discontinuation
Source: JCI Insight. 2023 Sep 22;8(18):e167790. doi: 10.1172/jci.insight.167790 (PMC10561722; doi:10.1172/jci.insight.167790)
Supplement: Supplemental data [file jciinsight-8-167790-s137.pdf]

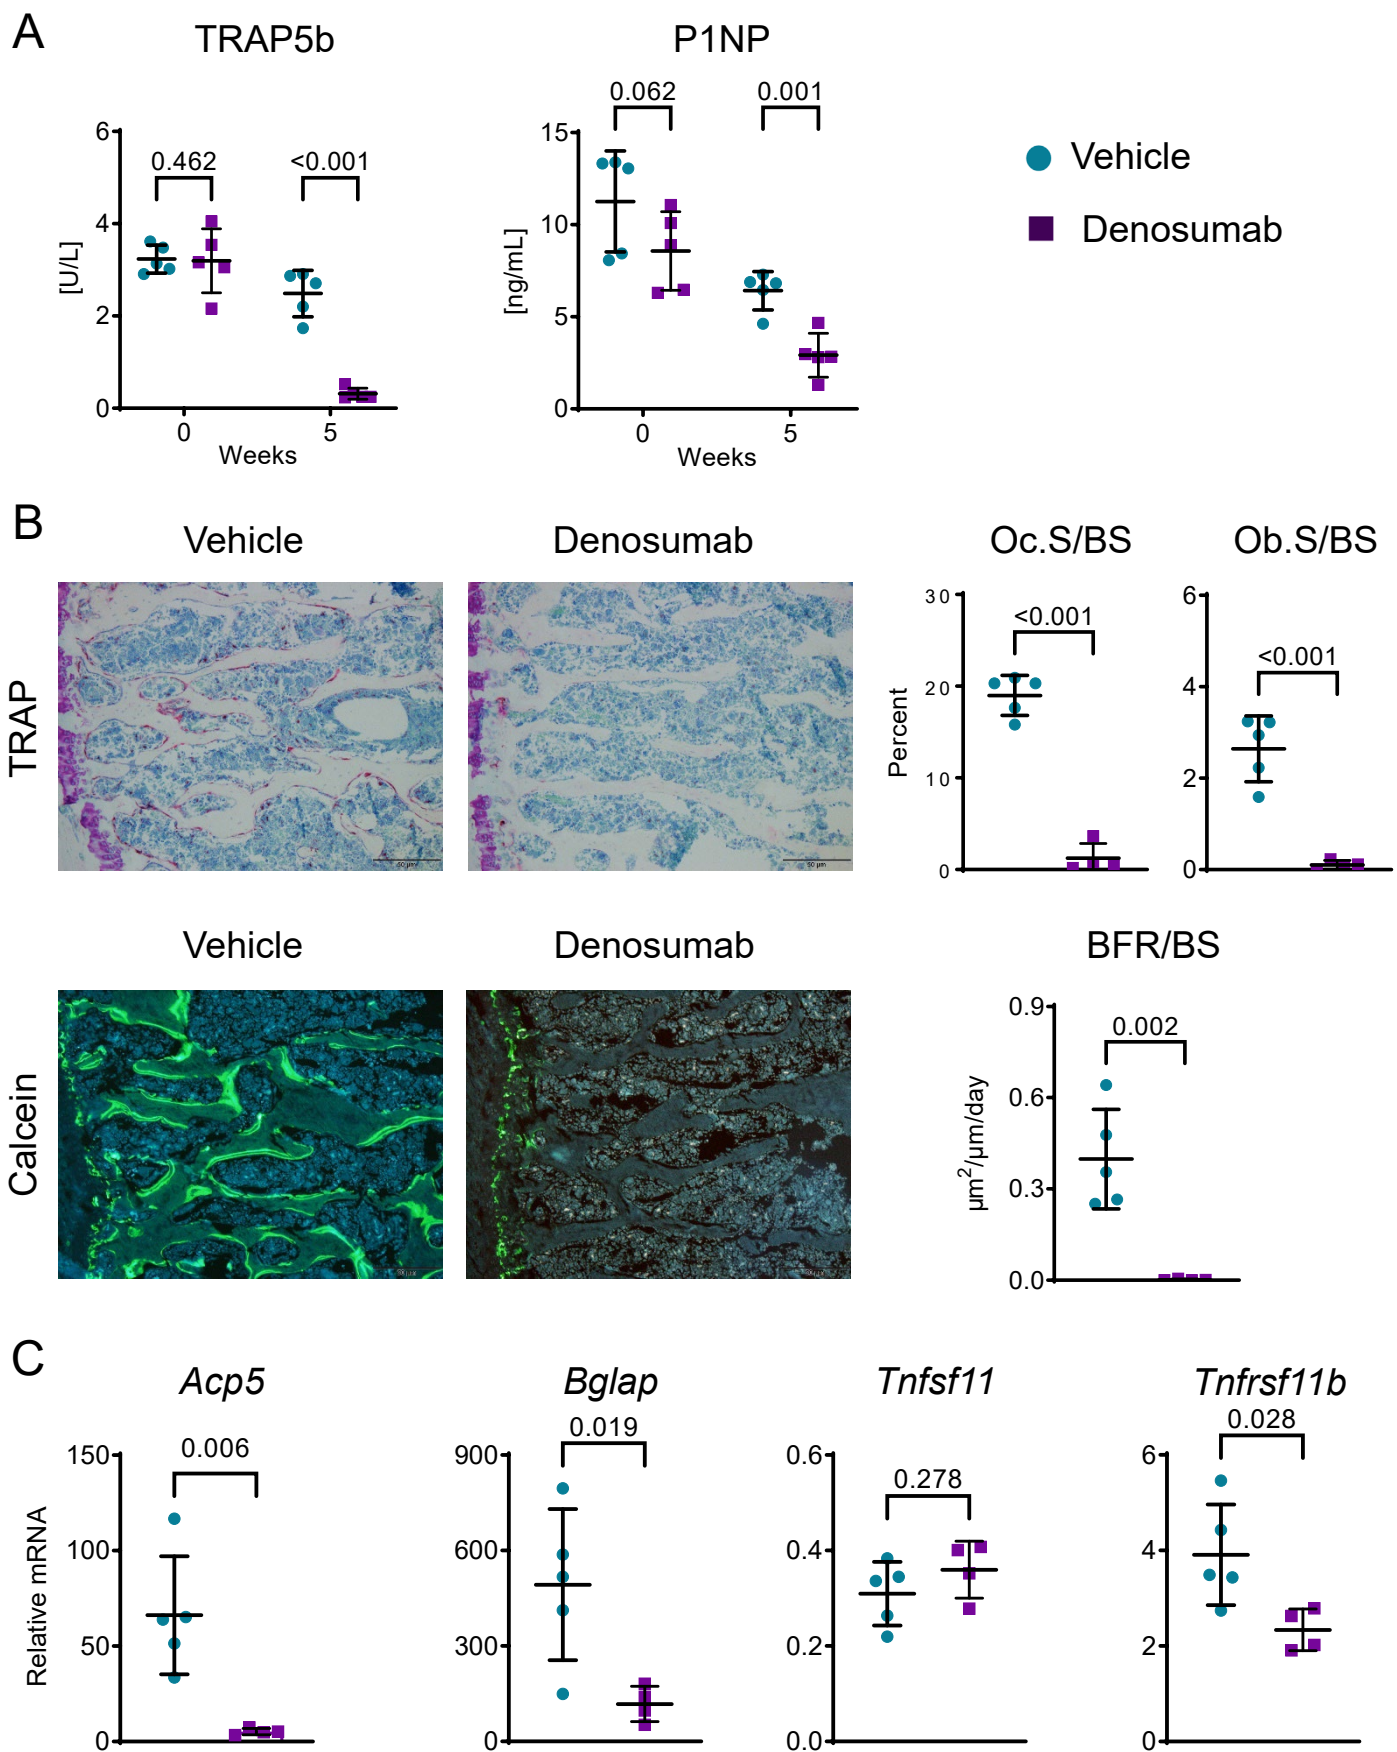

Figure S1

Dmp1-Cre;Ai9

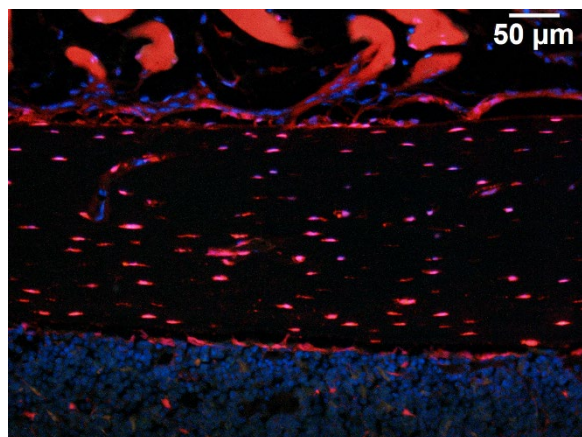

Tomato-positive  
osteocytes: 96.3%

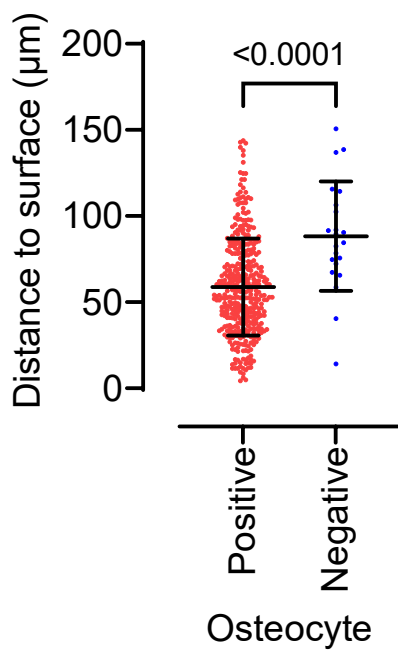

Sost-Cre;Ai9

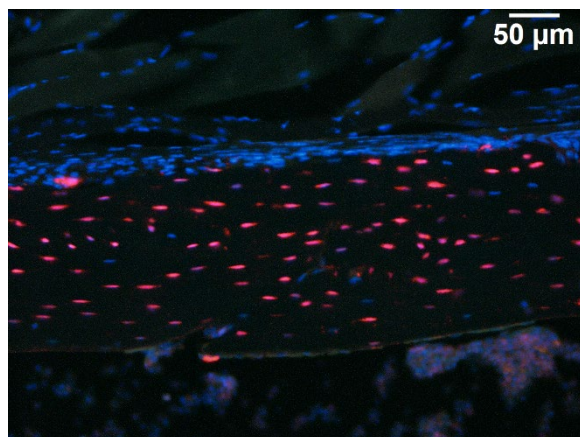

Tomato-positive  
osteocytes: 80.8%

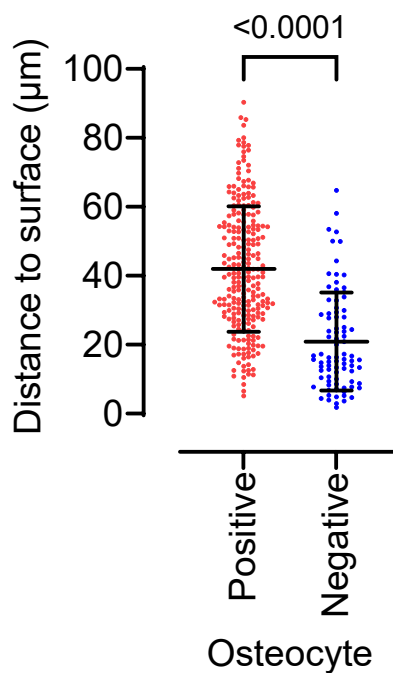

*Tnfrsf11b*

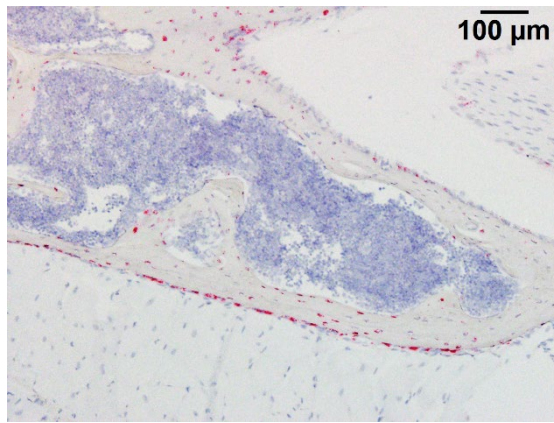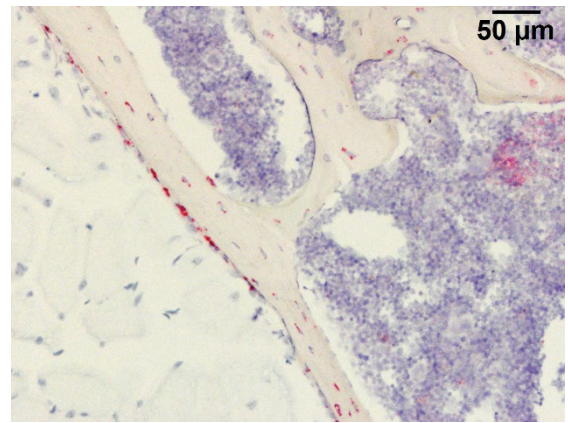

*Bglap*

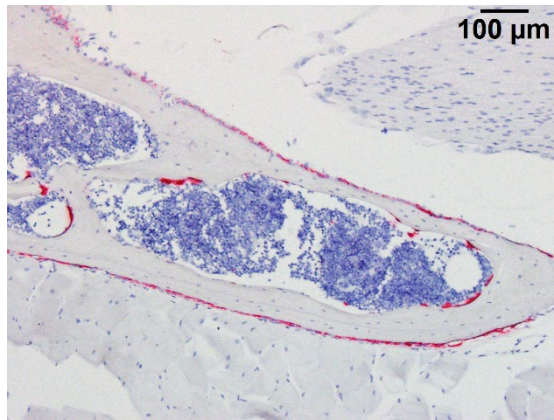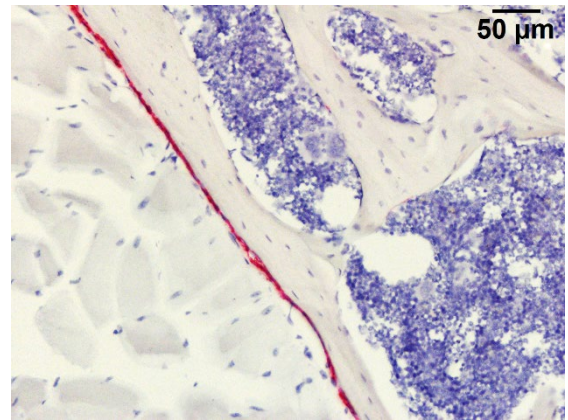

Figure S3

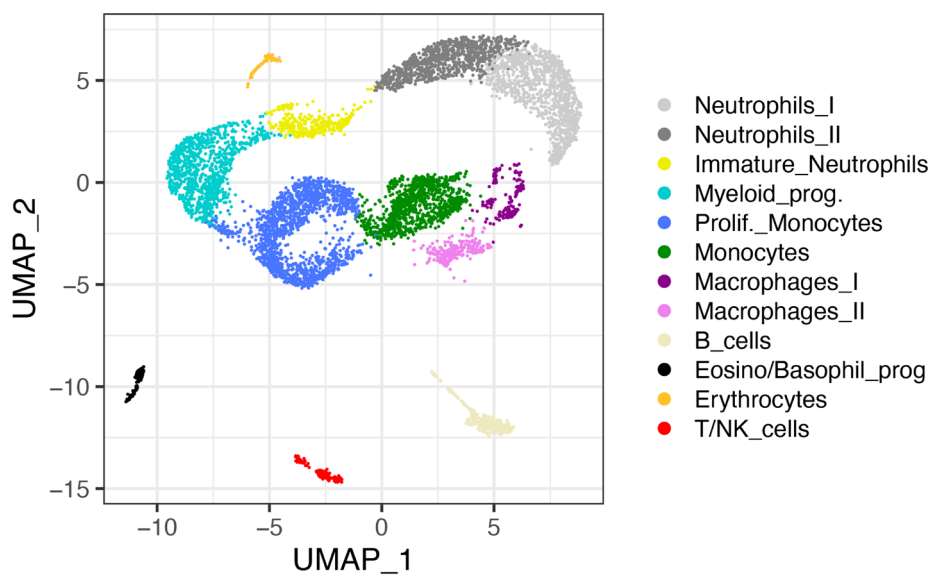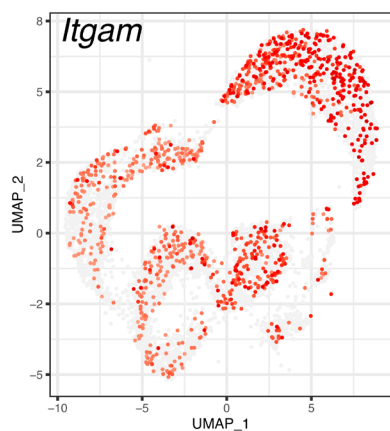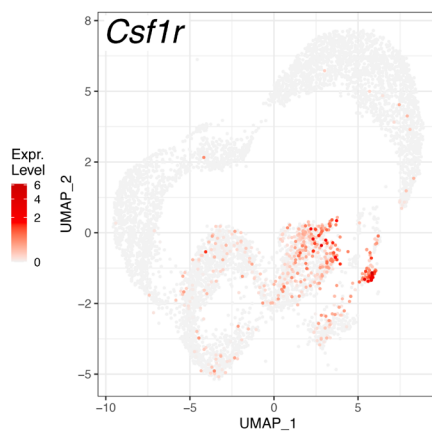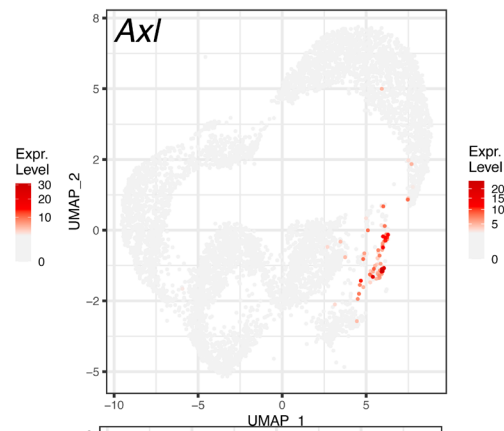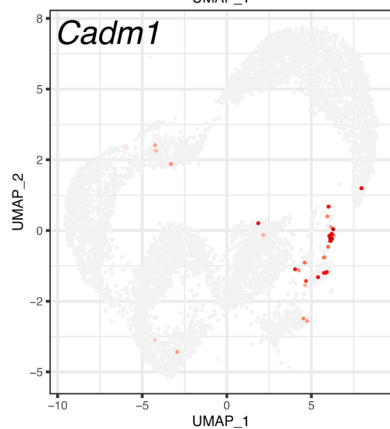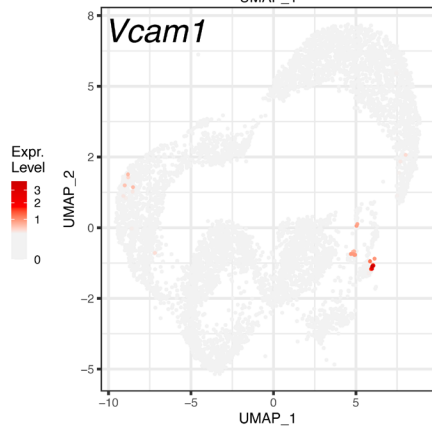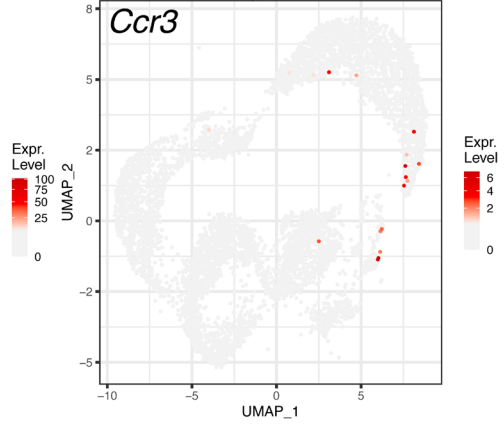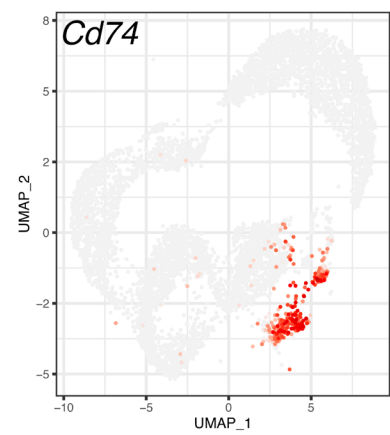

Figure S4

## Supplementary Figure Legends

**Figure S1. Reproducibility of denosumab effects on bone remodeling.** Nine-week-old male hRANKL mice were injected with vehicle or denosumab (5 mg/kg) once every 2 weeks for a total of 3 doses. Bones were harvested 1 week after the last dose. **(A)** Serum TRAP5b and P1NP measured 5 weeks after the first injection.  $n = 5$  per group. **(B)** Vertebral histomorphometry. Top images are of vertebral sections stained for TRAPase and toluidene blue. Bottom images are of unstained vertebral sections viewed by epifluorescent microscopy. Oc.S/BS, osteoclast surface per bone surface; Ob.S/BS, osteoblast surface per bone surface; BFR/BS, bone formation rate per bone surface. Vehicle  $n = 5$ , denosumab  $n = 4$ . **(C)** Gene expression of the indicated genes using Taqman assays of RNA from cortical bone. Vehicle  $n = 5$ , denosumab  $n = 4$ . Bar and whiskers are the mean  $\pm$  s.d. and  $P$  values are from 2-tailed unpaired  $t$  tests.

**Figure S2. Sost-Cre does not target new osteocytes.** Images of femoral bone sections viewed by epi-fluorescent microscopy from 4-month-old Dmp1-Cre;Ai9 mice and Sost-Cre;Ai9 mice. Numbers below the images indicate the percentage of osteocytes expressing the tdTomato reporter gene. A total of 793 osteocytes were counted for Dmp1-Cre and 625 for Sost-Cre. Graphs below the images show the distance of tomato-positive and tomato-negative osteocytes from the nearest femoral cortical surface. Bar and whiskers are the mean  $\pm$  s.d. and the  $P$  value is from a Mann-Whitney test. Osteocytes for each transgene were measured in 2 mice.

**Figure S3. Osteoblasts express *Tnfrsf11b*.** In situ hybridization of vertebral bone from 5-month-old male mice using the indicated probes. The top panels show that some periosteal cells express *Tnfrsf11b* and that cells in the same region in serial sections also express *Bglap*, demonstrating that they are osteoblasts.

**Figure S4. UMAP of genes expressed by osteomorphs in murine myeloid cells.** The top panel shows the combined UMAP of cells from vehicle and denosumab-treated mice (6230 cells in total). UMAPs showing the expression patterns of osteomorph-related genes are shown below. Cd11b is encoded by *Itgam*.
